## An improved assembly of the *Albugo candida* Ac2V genome reveals the expansion of the “CCG” class of effectors

Oliver J. Furzer<sup>1,5,\*</sup>, Volkan Cevik<sup>1,2,\*</sup>, Sebastian Fairhead<sup>1</sup>, Kate Bailey<sup>1</sup>, Amey Redkar<sup>1,3</sup>,  
5 Christian Schudoma<sup>1,6</sup>, Dan MacLean<sup>1</sup>, Eric B. Holub<sup>4</sup>, Jonathan D.G. Jones<sup>1,#</sup>

1. The Sainsbury Laboratory, University of East Anglia, Norwich NR4 7UH, United Kingdom

2. The Milner Centre for Evolution, Department of Biology and Biochemistry, University of Bath, Bath BA2 7AY, United Kingdom

10 3. Department of Genetics, University of Córdoba, Córdoba 14071, Spain

4. University of Warwick, School of Life Sciences, Warwick Crop Centre, Wellesbourne, CV35 9EF, United Kingdom

5. Current address: Department of Biology, University of North Carolina, Chapel Hill, NC 27599, USA

6. Current address: Structural and Computational Biology Unit, European Molecular Biology Laboratory (EMBL), 69117 Heidelberg, Germany

15

\* These authors contributed equally

# Corresponding author: [jonathan.jones@sainsbury-laboratory.ac.uk](mailto:jonathan.jones@sainsbury-laboratory.ac.uk)

### Abstract

20

*Albugo candida* is an obligate oomycete pathogen that infects many plants in the Brassicaceae family. We re-sequenced the genome of isolate Ac2V using PacBio long reads and constructed an assembly augmented by Illumina reads. The Ac2VPB genome assembly is 10% larger and more contiguous compared to a previous version. Our annotation of the new assembly, aided  
25 by RNASeq information, revealed a dramatic 250% expansion (40 to 110) in the CHxC effector class, which we redefined as “CCG” based on motif analysis. This class of effectors consist of arrays of phylogenetically related paralogs residing in gene sparse regions, and shows signatures of positive selection and presence/absence polymorphism. This work provides a resource that allows the dissection of the genomic components underlying *A. candida* adaptation  
30 and particularly the role of CCG effectors in virulence and avirulence on different hosts.

## Introduction

35 Oomycetes of the order Albuginales are obligate biotrophs and cause a white rust disease on  
plant hosts that resembles disease caused by basidiomycete rust fungi. Leaf pustules  
disseminate asexual spores that germinate on new leaves to enter the host via stomata and then  
emerge via formation of new pustules (blisters) beneath the epidermis that rupture at maturity to  
re-disseminate asexual spores (Holub et al. 1995). A key distinction, however, is that the  
40 asexual inoculum of oomycete rusts is a zoosporangium that releases motile spores in water,  
which swim and alight on stomata to initiate host penetration. Oomycete rusts also have an  
overwintering sexual phase, producing oospores from fertilization within leaf tissue which are  
released into soil as the host tissue decomposes, and then re-infect the next cycle of host plants  
via roots.

45 Oomycete rusts have evolved as angiosperm pathogens and include the genus *Albugo*  
which attacks brassica species (*Albugo candida*), spinach (*A. occidentalis*) and sweet potato (*A.*  
*ipomoeae*), and *Pustula* and *Wilsoniana* which attack Compositae (e.g, sunflower) or  
Chenopodiaceae, respectively (Brandenberger et al. 1994; Kamoun et al. 2015; Thines and  
Spring 2005). Interestingly, *Arabidopsis thaliana* is a natural host of two species, namely *A.*  
50 *laibachii* which commonly occurs on rosette leaves (Thines et al. 2009) and *A. candida* which  
attacks floral tissues (Fairhead 2016) in wild host populations. Subspecies or phylogenetic races  
of *A. candida* have co-evolved in different wild and domesticated host species of Brassicaceae  
(Jouet et al. 2019; Pound and Williams 1963). The species was first described as a pathogen  
of *Capsella bursa-pastoris* (Shepherds Purse), now referred to as *A. candida* race 4, and is also  
55 commonly found on other wild relatives including *A. thaliana*, *A. lyrata* and *Cardamine spp.*  
(Holub et al 1995; Jouet et al 2019). Other subspecies that have specialised on economically  
important vegetable and oilseed brassicas include Race 2 from *B. juncea*, Race 7 from *B. rapa*  
and Race 9 from *B. oleracea*.

During infection of a compatible host, *Albugo* grows as a network of aseptate hyphae  
60 between mesophyll cells of the host leaf, and then penetrates through cell walls to produce  
specialised feeding structures called haustoria by invaginations of the host plasma membrane.  
Haustoria provide an intimate interface for coordinated nutrient acquisition and suppression of  
host defense responses by delivery of effector proteins. Intracellular nucleotide-binding leucine-

rich repeat (NLR) immune receptors in a resistant host enable specific detection of effectors and triggering of innate immunity. Interestingly, a single NLR protein has been reported which confers broad spectrum white rust resistance (*WRR4A*) to *A. candida* races 2, 4, 7 and 9 (Borhan et al. 2008). However, natural pyramiding of multiple NLRs has been proposed to explain the divergence of *A. candida* subspecies as a consequence of host species-level resistance (Cevik et al. 2019).

Genome sequencing revealed that *A. candida* and *A. laibachii* have compact genomes of ~40 megabases (Mb) that show signatures of obligate biotrophy, for example lacking certain key enzymes and Necrosis and Ethylene inducing peptides (NEPs) commonly present in phytopathogen genomes. A unique class of secreted effector candidates, that possess what was termed the “CHxC” amino-acid motif, can in a motif dependent manner translocate inside plant cells and suppress plant immunity (Kemen et al. 2011; Links et al. 2011). Analysis of variation in five additional *A. candida* genomes representing four races (2, 4, 7, 9) showed that recombination followed by clonal propagation likely underpins the emergence of new strains (McMullan et al. 2015). Pathogen-enrichment sequencing (PenSeq) on the CHxC effector repertoire and a 400 kilobase (kb) region of 91 field samples revealed that host plant species and *A. candida* races were assorted congruently in terms of phylogeny, suggesting that host adaptation and specialization occur in the field. That study also provided evidence that certain *A. candida* races have increased ploidy levels, with the likely outcome that these lineages can only propagate asexually (Jouet et al. 2019).

Genes encoding effector proteins are often amongst the most variable in the genome and can be embedded in repetitive regions that hinder genome assembly (Raffaele et al. 2010). We speculated that available *Albugo* genome assemblies were incomplete, and likely lacking up to 20% of sequences. To improve our understanding of *A. candida* infection and to gain further insights into *A. candida* effector repertoires, we used long-read sequencing platforms to generate an improved genome assembly of an *A. candida* race 2 strain from Canada (Ac2V). This, combined with new RNA-Seq data, allowed us to generate a more complete annotation, and expand the number of candidate CHxC (now renamed CCG) effectors more than two-fold. Analysis of the CCG repertoire revealed that i) CCGs are polymorphic and show presence/absence variation amongst *A. candida* races, and ii) they have expanded differentially in comparison to the related species *A. laibachii*, which may be driven by pressure to avoid

95 recognition by host immune receptors. Consistent with this, two companion papers (Redkar et al. 2021 and Castel et al. 2021) report the multiple CCG effectors recognized by different alleles of the resistance genes *WRR4A* (Borhan et al. 2008) and *WRR4B* (Cevik et al. 2019). Our analysis of the Ac2V genome provides an essential foundation for further investigation of *Albugo* effectors.

100

## Results

### Sequencing and assembly of a PacBio based Ac2V reference genome

105 We extracted high-molecular weight DNA from a Canadian isolate of *A. candida* race 2 (Ac2V) (Rimmer et al 2009) and submitted it for sequencing on the PacBio RSII platform. Before assembly, raw PacBio reads were corrected with previously obtained Illumina reads (McMullan et al. 2015). Following error correction, we obtained reads with a total length of 1,219,162,236 bp (approximately 30.5x coverage) and N50 of 7093 bp. The corrected reads were then used  
110 for *de novo* genome assembly. We named the assembly Ac2V “PacBio”, hereafter “Ac2VPB”.

Compared to the Ac2VRR (SOLID-based; (Links et al. 2011)) and AcNc2 (Illumina-based; (McMullan et al. 2015) genomes our 39.9 Mb assembly is longer and more contiguous with an N50 of 466 kilobases (kb) and an average contig size of 196 kb (Table 1, Figure 1A). Ac2VRR has a similar scaffold length distribution, but has a high number of Ns (1.7 Mb), representing  
115 gaps in the sequence. Subtracting those and splitting non-contiguous scaffolds reveals the relative contiguity of the Ac2VPB assembly (Figure 1A).

We aligned Illumina reads from Ac2V to each genome and found that the Ac2VPB genome allowed the mapping of 95.5% of total reads, compared to 78.3% for Ac2VRR (Table 1). The previous Ac2VRR genome was constructed using scaffolding and contained 1.7 million  
120 Ns, showing that large parts of the genome were unresolved, likely due to repetitiveness. To compare the repeat content of the genomes, we plotted the frequency of unique 27mers and compared them to the raw Illumina data. This revealed that the Ac2VRR genome is missing many kmers which occurred repeatedly (25-200 occurrences), whereas these are represented in the Ac2VPB genome. Comparison to the kmer-content of the Illumina reads (average depth  
125 250) shows that there are some highly repetitive regions (27-mers occurring >300 times)

unaccounted for, even in Av2VPB. We estimate the overall repeat content of the Ac2VPB assembly to be 29%, of which half is composed of retroelements (for full analysis of repeats, see Supplemental Data 1).

130 We further used the mapped Illumina reads to check for either misassembled regions or potential hemizygous regions. Coverage showed a normal distribution centered around 250x and no large region was enriched for either low or high depth (Figure 1C). Likewise, gene depth showed a compact normal distribution, suggesting that most genes are represented at diploid copy number (1 copy, 2 alleles; Supplemental Figure 1A). Of 15,445 quality control-passing SNPs detected, 71% had an allele frequency >0.33 and <0.66, suggesting that Ac2V has a  
135 diploid genome (Figure 1D).

**Table 1. Genome statistics**

|                            | <b>Ac2vRR</b> | <b>Ac2vPB</b> |
|----------------------------|---------------|---------------|
| Scaffolds/Contigs          | 252           | 198           |
| N50 size (bp)              | 375,021       | 466,138       |
| N50 (scaffold/contig)      | 33            | 29            |
| Average contig length (bp) | 137,158       | 196,775       |
| Assembly content (bp)      | 34,563,972    | 38,961,604    |
| Gaps (Ns)                  | 1,728,198     | 0             |
| % Ac2v reads mapping       | 78.26         | 95.50         |
| Repeat content (bp)        | 5,875,875*    | 11,287,808    |

\*excluding Ns

150

155

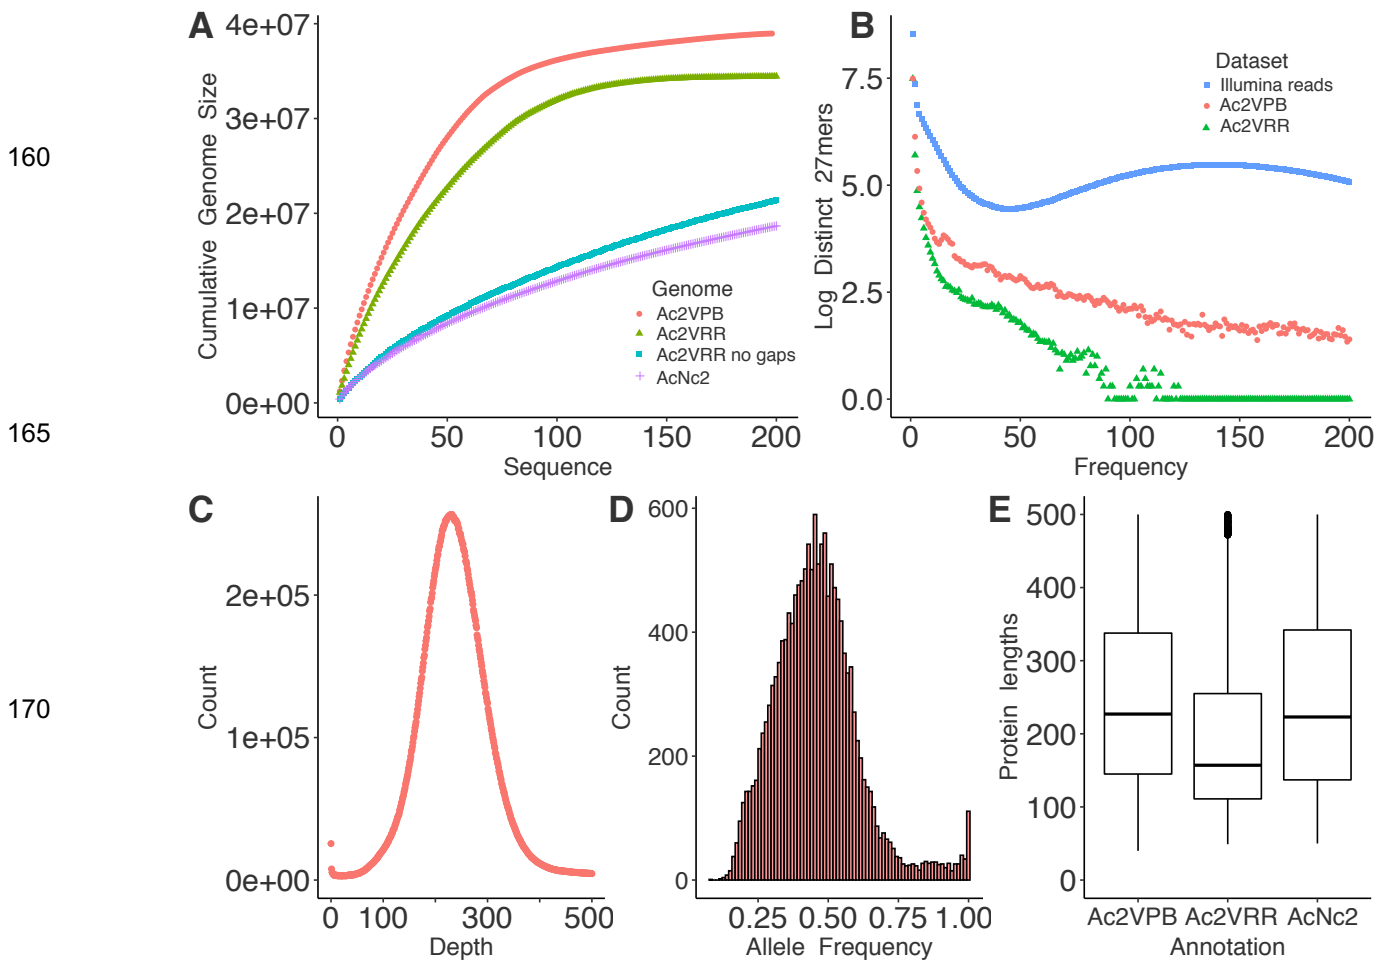

**Figure 1. PacBio sequencing produces a more complete *Albugo candida* Ac2V genome and annotation**

1A. Plot comparing the cumulative increase of genome size by size-sorted sequence (contig or scaffold) in the Ac2VPB, Ac2VRR, Ac2VRR 'no gaps' and AcNc2 assemblies. The first 200 sequences only are displayed. Ac2VRR 'no gaps' and AcNc2 have many further smaller sequences that were thus excluded.

1B. Plot of the log number of unique kmers of length 27 bp (27mers) and their frequency of occurrence in Ac2VPB and Ac2VRR assemblies compared to Ac2V Illumina reads.

1C. Plot of counts of Illumina read depth across the Ac2VPB genome.

1D. Histogram of allele frequency at all sites showing allelic variation when Illumina reads were mapped to the Ac2VPB genome.

1E. Boxplots of the distribution of protein lengths comparing the annotation of Ac2VPB, Ac2VRR and AcNc2.

## Annotation and search for candidate effector encoding genes

190 RNA was extracted from Ac2V-infected *Brassica juncea* cultivar “Burgonde” plants at 2, 4, 6 and 8 days post infection (dpi) and used for library preparations and sequencing of 100 bp paired-end reads on Illumina HiSeq2000. The RNASeq reads were then mapped to the Ac2VPB assembly. The overall read alignment rates were 1.8, 17.2, 40.4 and 47 % for 2, 4, 6 and 8 dpi samples, respectively. Trypan-blue staining was used to visualize pathogen growth, which was  
195 correlated with the proportion of reads that mapped to Ac2VPB (Supplemental Figure 2).

These data were also used as evidence in a holistic gene prediction process (see methods) alongside previous cDNA and protein models from published annotations (Ac2VRR, AcNc2 and AINc14). The result is a new annotation that contains fewer but longer predicted genes (Figure 1E), and is more complete, as evaluated by BUSCO (Simão et al. 2015) (Ac2VPB: 89% complete fungal BUSCOs vs Ac2VRR: 60% or AcNc2: 82%; Table 2.). The coding space  
200 of the new genome is over 1 Mb larger than the Ac2vRR annotation (Table 2.) The AINc14 genome was reported to lack nitrate and sulphite reductases, and the molybdopterin biosynthesis pathway (Kemen et al. 2011). These are also absent from Ac2VRR and Ac2VPB. Overall, the gene-coding ‘compartment’ of Ac2VPB remains highly compact, with intergenic  
205 distances averaging 1.3 kb. The expanded secreted protein complement contained 13 proteins with similarity to CRinkling and Necrosis (CRN) class effectors (Stam et al. 2013) and at least 40 potential cell wall modification enzymes, including 16 candidate secreted glycosyl hydrolases (Supplemental Data 2). A search of all predicted secreted proteins (no transmembrane domain) with the RXLR HMM revealed no RXLR effector candidates (Win et al. 2007).

210 We searched the expanded secretome for CHxC effectors. A MEME (Bailey et al. 2009) motif was constructed using a database of CHxC effectors identified from Ac2VRR and AcNc2 and used as input for a MAST search of the Ac2VPB database of proteins with predicted secretion signal (SignalP3.0; (Bendtsen et al. 2004)) and lacking additional predicted transmembrane helices (TMHMM; (Krogh and Rapacki 2016)). From this search we identified  
215 110 CHxC protein candidates, 70 and 75 more than were identified in Ac2VRR and AINc14 respectively (Figure 2A) and accounting for around 10% of the secretome.

We generated a new motif from the newly expanded CHxC complement. Compared to the consensus motif from AINc14, we found that the previously reported histidine residue in the

220 CHxC motif was less conserved in Ac2VPB, but a glycine six amino acids after the second cysteine was highly conserved, making the consensus motif CxxCxxxxxG. For simplicity, we redefined the effector class as “CCGs” in *A. candida* (Figure 2B). Within figures in this paper, CHxC names from *A. laibachii* were converted to AICCG. These names do not indicate orthology between *A. candida* and *A. laibachii* CCGs sharing the same number, CHXC numbers were carried over from Kemen et al (2010).

225 Amongst the CCGs, only seven showed homology to functionally annotated proteins or domains. Of those 7, 6 were annotated as “AMP-activated protein kinase beta subunit” (Supplemental Data 2). The CCGs were checked for coverage artefacts and show a similar coverage distribution as the overall gene complement (Supplemental Figure 1B).

230 The CCGs show a significant tendency to have longer than average intergenic distances as revealed by plotting the 5’ and 3’ intergenic distances (Figure 2C) and by comparing combined intergenic distances against other genes (Student’s T-test,  $p < 0.001$ ). We generated an alignment using the CCG and surrounding region of 60 amino acids (the only part where all the proteins in the family could be aligned) and produced a maximum-likelihood phylogeny. This revealed that the CCG effector family in Ac2V falls into 7 major phylogenetic clades (Figure 2D).  
235 As a result of the longer contigs of Ac2VPB, it became apparent that these clades largely correspond to physically co-located gene clusters, suggesting that CCGs have undergone parallel segmental duplications forming clusters at different locations across the genome (Figure 2E, Supplemental Data 3).

240 **Table 2. Annotation statistics**

|                                                           | Ac2vRR     | Ac2vPB     |
|-----------------------------------------------------------|------------|------------|
| Predicted genes                                           | 15,826     | 13,073     |
| Total protein length                                      | 4,898,153  | 5,869,091  |
| Average protein length                                    | 310        | 449        |
| Predicted secreted proteins without transmembrane domains | 929        | 1104       |
| Complete Fungal BUSCOs number (%)                         | 173 (59.7) | 250 (89.0) |
| Predicted CCG effectors                                   | 40         | 110        |



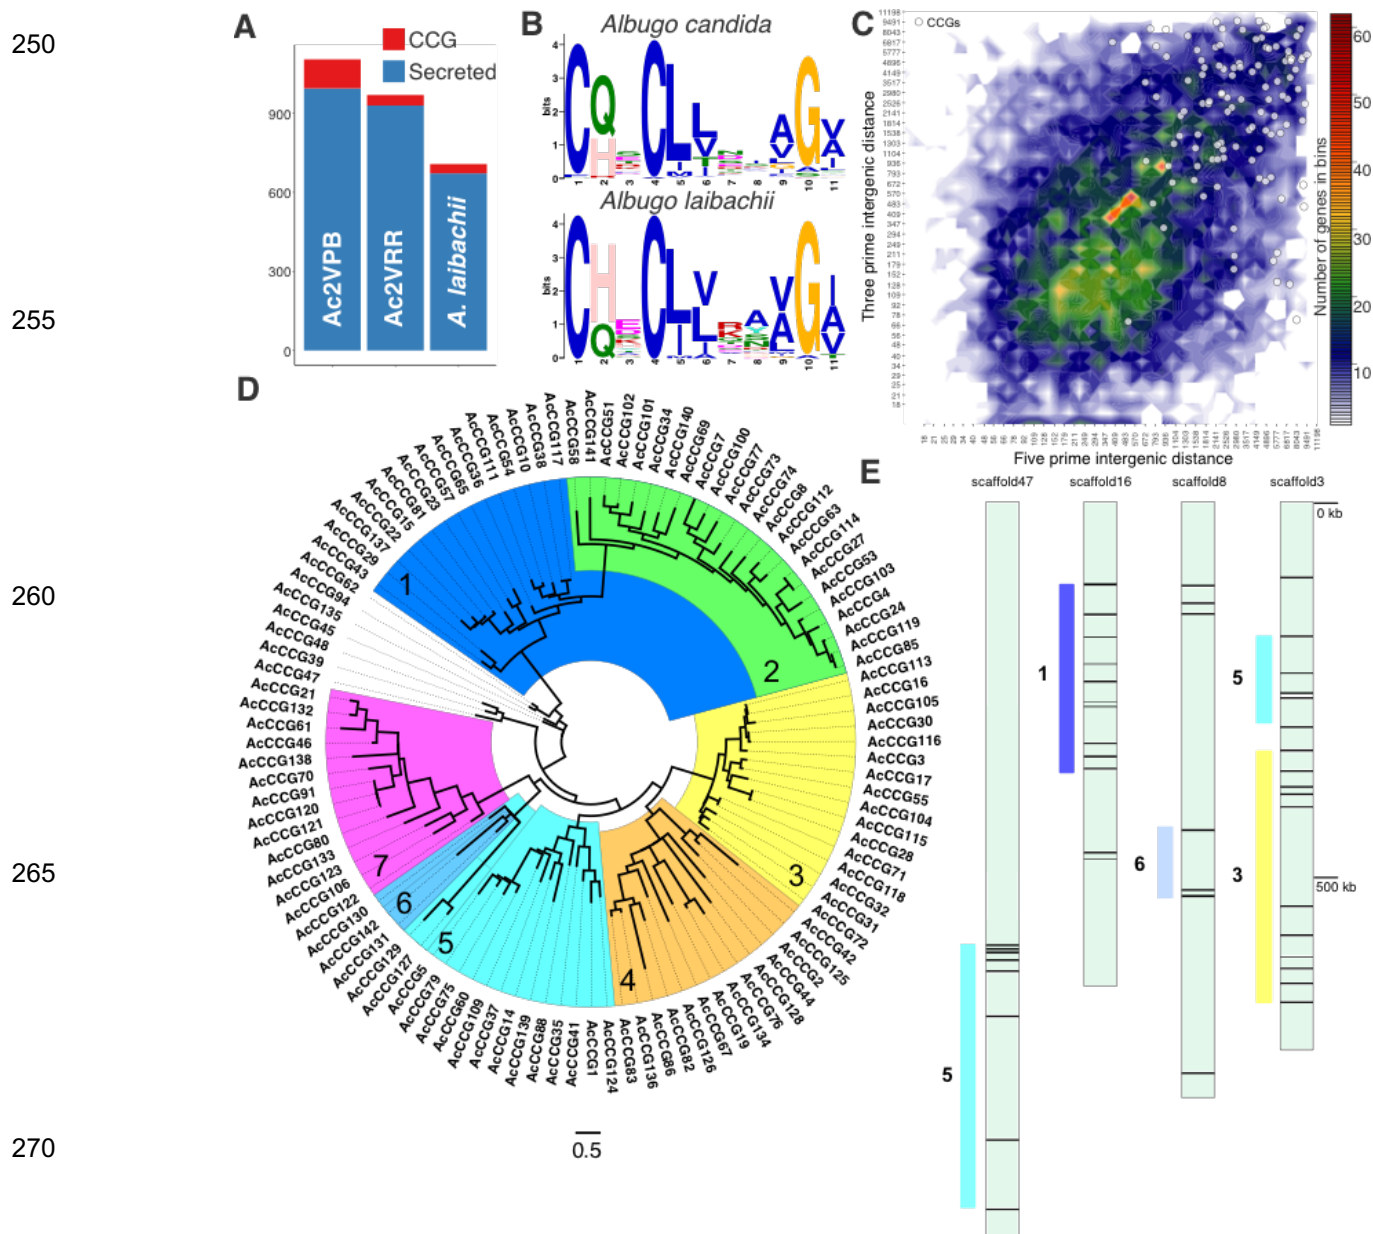

**Figure 2. The CCGs are an expanded family of secreted proteins in the *Albugo candida* Ac2V genome**

2A. The CCG motifs in *A. candida* Ac2VPB and *A. laibachii* Nc14.

2B. Barchart of the predicted secretome content of Ac2VPB, Ac2VRR and AINc14.

2C. Genome density 'volcano' plot of the Ac2VPB annotation overlaid with white dots representing the CCG complement.

2D. Maximum-likelihood phylogeny of CCG proteins in Ac2VPB. This is based on an alignment of 60 amino-acids surrounding the conserved CCG motif. Colors and numbers indicate manually annotated phylogenetically related clusters of CCG proteins. Scale bar represents substitutions per site.

2E. Positioning in clusters of CCGs on four selected CCG-rich scaffolds. Colored bars and numbers indicate co-incidence of these clusters with those defined in 2D.

280

## Analysis of diversity in candidate effector encoding genes

To assess diversity and selection across the genome we used Illumina sequencing data from six additional *A. candida* isolates of race 4 (AcEx1, AcEm2 and AcNc2), race 7 (Ac7V) and race 9 (AcBoT and AcBoL) (McMullan et al. 2015; Prince et al. 2017). SNP data was used to compare gene-level nucleotide diversity and Tajima's D ((Tajima 1989); a measure of balancing selection) across the CCGs, predicted secreted proteins and remaining genes. There was no statistical difference between any of these groups (Figure 3A and 3B, ANOVA p-values > 0.05). We noted however the high degree of divergence between these strains which despite being classified as the same species, are differentially adapted to diverse specific host ranges (Jouet et al. 2019); average genome wide identity to Ac2VPB ~ 98%). This divergence means that in gap-ridden cross-strain alignments of CCG regions, fewer high-quality SNPs could be assigned, resulting in artificially low diversity scores. It was possible to use predicted insertions/deletions (indels) in addition to SNP data to derive an estimate of the proportion of non-synonymous to synonymous changes (pN/pS) and/or pseudogenization in all races in each gene, and in this analysis the CCGs have a significantly higher pN/pS ratio compared to the other two categories (ANOVA, Tukey test  $p < 0.001$ , Figure 3C). Further taking into account zero coverage regions, CCGs showed presence/absence polymorphism across the seven races: 27 Ac2V CCGs are absent in one or more of the 6 additional races, and as a class they show a stronger tendency for presence/absence polymorphism compared to other genes or genes encoding non-CCG secreted proteins (Figure 3D), as assessed by the alignment of Illumina reads from the 7 *A. candida* isolates.

The RNASeq reads that were mapped to the assembled Ac2VPB genome were also used to determine the expression levels of CCGs and other secreted protein-encoding genes across all colonization time-points and were grouped into expression clusters (Figure 3E). CCGs showed a full spectrum of expression patterns, from exclusively early expression, to constitutive expression or expression late in the infection. These expression patterns seem to be independent of genomic cluster location, pN/pS ratio or phylogenetic relatedness (Supplemental Data 2).

310

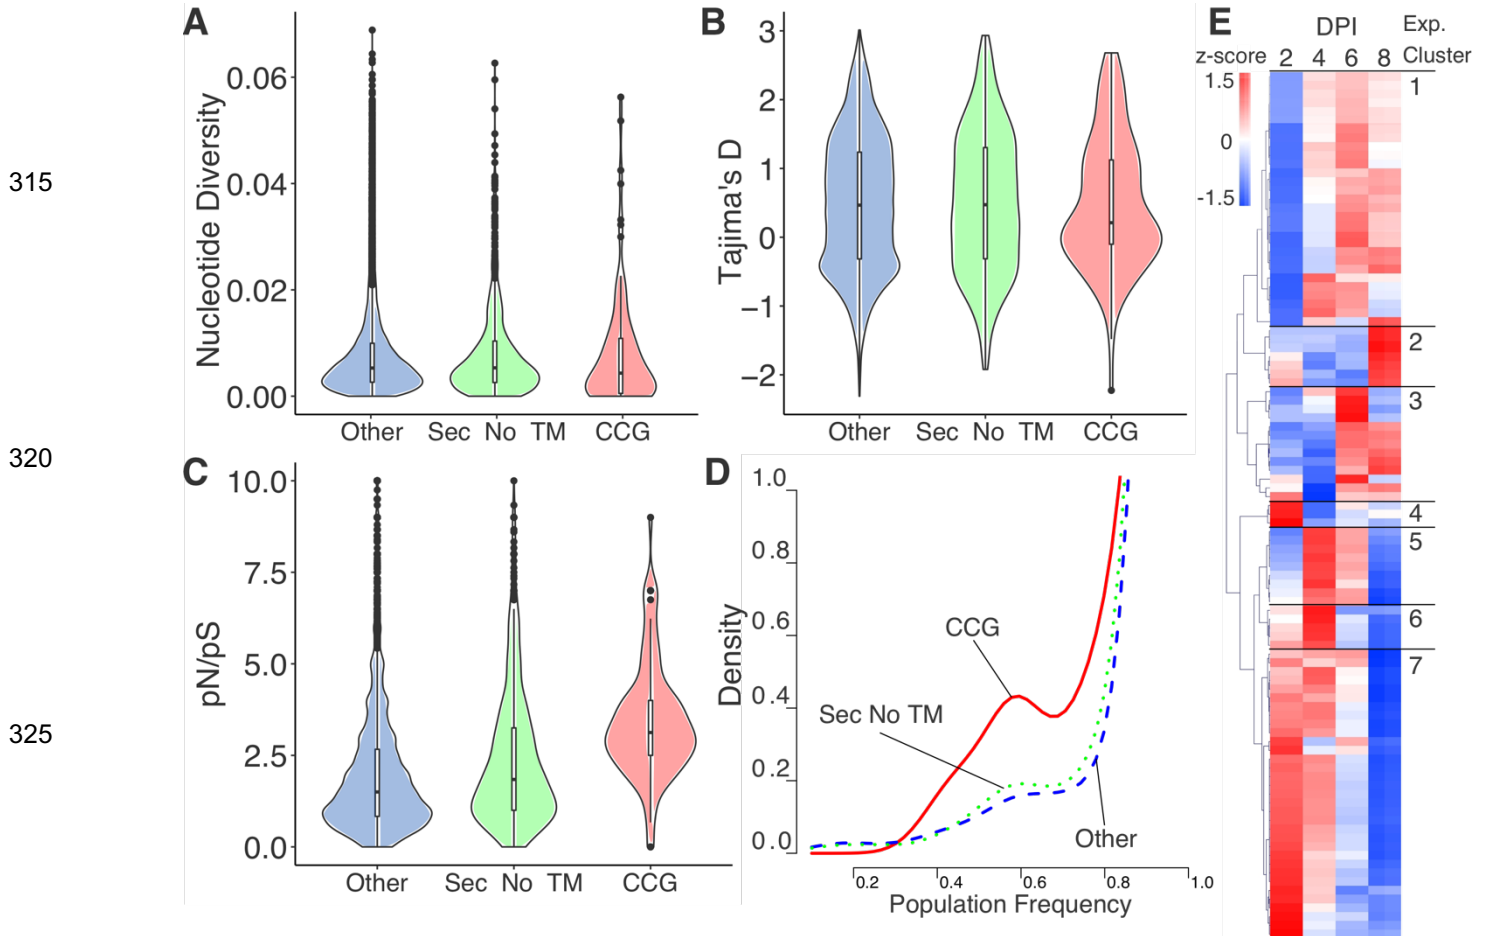

**Figure 3. The CCGs in *Albugo candida* are polymorphic and have diverse transcriptional profiles**

3A. Distribution of nucleotide diversity (data from seven *A. candida* races) amongst three classes of genes encoding: CCGs, secreted without additional transmembrane helices and others (the remainder).

3B. Distribution of Tajima's D (data from 7 isolates) amongst three classes of genes encoding: CCGs, secreted without additional transmembrane helices and others (the remainder).

3C. Distribution of the uncorrected proportion of non-synonymous to synonymous mutations (data from 7 races) amongst three classes of genes: CCGs, secreted without additional transmembrane helices and others (the remainder).

3D. Population frequency of three classes of genes amongst 7 *A. candida* races. Most genes are present across all races (right side of graph). CCGs show an increased proportion of genes present at an intermediate frequency. The y-axis 'density' is an arbitrary scale that is necessary to compare density plots across 3 unequally sized groups.

3E. Clustering of CCG encoding genes based on their expression pattern. DPI=days post infection. z-score represents the number of standard deviations away from the normalized mean expression a given measurement is.

To compare CCGs in *A. candida* and *A. laibachii*, we constructed a combined phylogeny of these proteins focused around the CCG motif. We found that at the clade level, most CCGs and CHxCs had at least one analog in the sister species, however each had undergone a differential pattern of gene family expansion. Several clusters are greatly expanded in *A. candida* and while others are more expanded in *A. laibachii*. CCGs that have evidence of recognition by WRR4A or WRR4B in Redkar et al (2020) are highlighted and belong to clades that have specifically expanded in either family, we confirmed that identity is retained in a restricted region around the CCG (Figure 4B, 4C). We observed a frequent feature of two pairs of cysteines located at ~50 amino acids after the CCG motif. Additionally, we noted complete divergence regarding both identity and length of the C-terminal region occurred in many paralogs (data not shown).

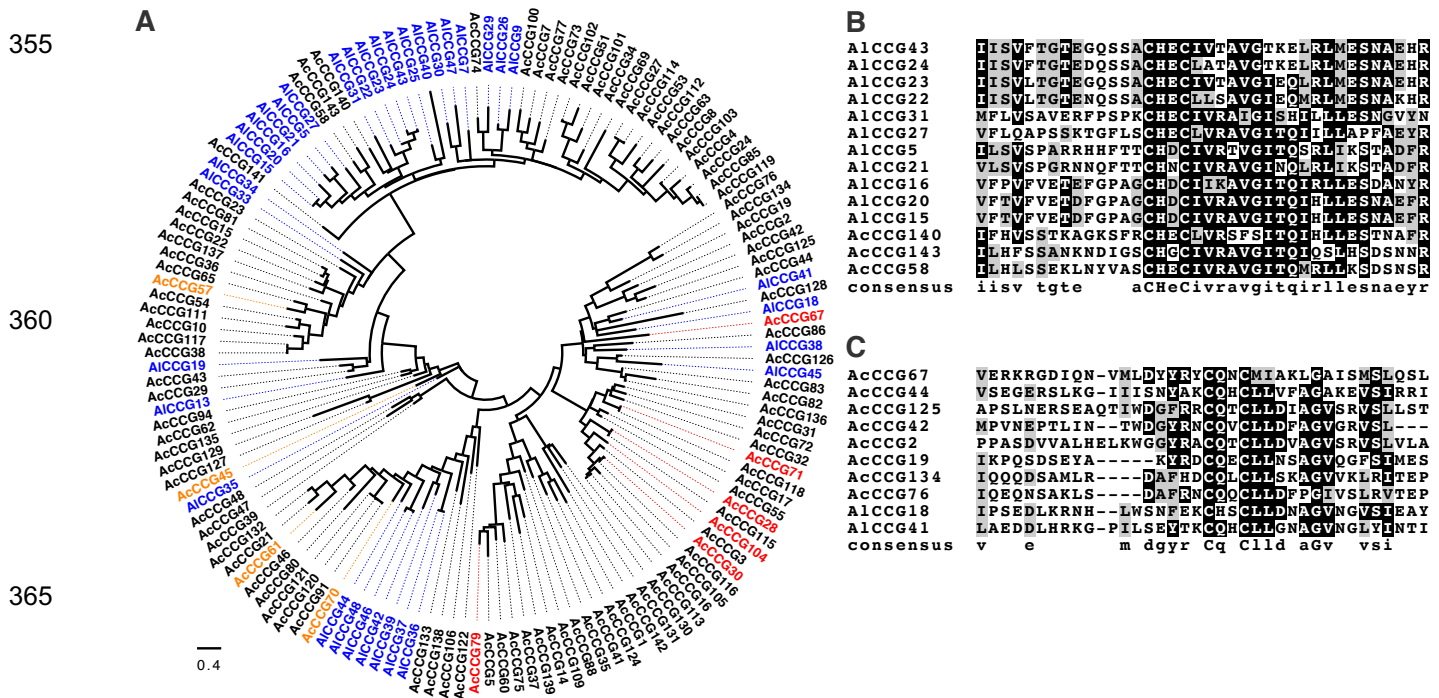

**Figure 4. Differential CCG clade expansions in *Albugo candida* and *A. laibachii***

4A. Maximum-likelihood phylogeny incorporating CCG proteins from Ac2VPB and AINc14. This is derived from an alignment of the 60 amino-acids surrounding (and including) the conserved CCG motif. Circles indicate the putative Ac2VPB orthologs of CCGs reported recognized by the *Arabidopsis thaliana* Col-0 R proteins WRR4A (red) and WRR4B (orange). Scale bar represents substitutions per site.

4B. Example alignment of an AINc14 expanded clade.

4C. Example alignment of an Ac2VPB expanded clade.

Based on the expansion of CCGs in the Albuginales, we speculated that ancestral genes might exist in other oomycetes. We investigated CCG presence in four *Phytophthora* species, *Hyaloperonospora arabidopsidis*, *Pythium ultimum*, and *A. thaliana* as a plant control, using the Motif Alignment & Search Tool (MAST; (Bailey et al. 2009)). We identified 3 potential hits (E-value <0.1) from *P. parasitica* and two from *P. infestans* (Supplemental Data 4). No hits were found in either *P. ultimum* or *A. thaliana*. Only two from *P. parasitica* contained predicted secretion signals directly prior to the CCG motif, a feature of all Albugo CCGs. When inserted into the overall alignment and phylogeny of CCGs from *A. candida* and *A. laibachii*, these candidates form a distant clade with at best 16% amino acid identity in the CCG region to the nearest CCG from Ac2vPB or AINc14 (Supplemental Figure 3).

## Discussion

We present an improved reference genome for *A. candida*. The genome is still not fully complete, nor assembled into full chromosomes. In the future, methods such as Bionano and Nanopore-based sequencing may enable a fully contiguous *A. candida* genome to be assembled.

The analysis of Ac2V in Jouet et al (2019) was inconclusive about its ploidy level. Non-diploids are generally infertile. In addition to our genome-wide analysis of SNP allele frequency it was reported that Ac2V was capable of mating with an isolate of *A. candida* race 7, with avirulence segregating 3:1 in F<sub>2</sub> progeny (Adhikari et al. 2003). Together these data support Ac2V as a diploid.

A major outcome of our investigation of the improved genome is the expansion of the predicted repertoire of CCG class effectors by 250%. Other oomycete plant pathogens from the Peronosporalean lineage, which evolved plant pathogenicity independently from the Albuginales, have large families of RxLR and CRN effectors (Baxter et al. 2010; Haas et al. 2009; Torto et al. 2003). The presence of CRN effectors in Ac2V suggests that a common ancestral CRN predates plant pathogenicity, and the expansion to 9 copies may indicate some role in parasitism of plants by *A. candida*.

We performed a phylogenetic analysis of the CCGs and found a link between physical genome location and phylogenetic assortment. The clustering of effectors or virulence factors in microbes is a wide-spread phenomenon, allowing for both the epigenetic co-regulation of these

clusters and facilitating mutation and duplication by unequal crossovers (Kämper et al. 2006; Cuomo et al. 2007; Raffaele and Kamoun 2012). This clustering is also seen in fungal  
405 pathogens, for example the largest effector gene cluster encodes 24 secreted effectors in the corn smut pathogen *Ustilago maydis* (Brefort et al. 2014). In Ac2V, we found no evidence for transcriptional co-regulation of these clusters, however we propose that the segmental duplication of these CCG clusters occurred through sequential unequal crossovers. Some  
410 clusters spanned more than one genome scaffold. Since we have not resolved the genome to chromosome level, we do not know if these are part of the same large cluster on a single chromosome or represent inter-chromosomal transfer of one or more genes followed by further duplications.

In general, gene duplication is considered as a mechanism that facilitates adaptation, as  
415 increased gene copy number relaxes purifying selection on each paralog (Ohno 1970); (Soskine and Tawfik 2010). The CCGs have a higher rate of pN/pS and turnover than other genes that encode secreted proteins, suggesting that adaptive evolution of CCG sequence has been key to the co-evolution of *A. candida* races with their respective host species, in line with their predicted role as effectors. Likewise, the tendency of a proportion of CCGs to be absent in  
420 various *A. candida* isolates is consistent with these effectors being recognized by host species-specific NLR proteins. Regarding the origin of CCGs, we found a low copy number of distant CCG relatives in other oomycete genomes. More genome sequences of Albuginales and species that lie between them and the Peronosporales are needed to pinpoint the origin of this gene family. Our analysis suggests that following the evolution of a useful ancestor CCG effector,  
425 specific expansions occurred as *Albugo* lineages adapted to different hosts. Although we observe the expansion of several distinct CCG clades in *A. laibachii* Nc14, in light of this work it is likely that the CCG repertoire in such Illumina assemblies is under-reported.

Redkar et al (2021) and Castel et al (2021) discovered that certain CCG effectors are recognized by NLRs encoded by *WRR4* and related NLR-encoding genes in *A. thaliana*. Each  
430 *A. laibachii* isolate can grow on ~88% of *A. thaliana* accessions (Kemen et al. 2011), and resistance to *A. laibachii* has not been associated to the *WRR4* locus (Borhan et al. 2004). The pattern of expansion of CHxCs in *A. laibachii* is confined to clades that are distantly related to the recognized CCGs, whereas the expansions in Ac2V are in both the recognized clades, along with several others. We previously proposed that natural pyramiding of NLR-encoding genes

435 such as *WRR4A* and *WRR4B* in *A. thaliana* provides a non-host like protection against races of  
*A. candida* from brassica hosts (Cevik et al. 2019). We speculate that this has exerted selective  
pressure on CCG effectors in *A. laibachii* to avoid patterns enriched in CQxC clades, which were  
free to emerge and expand in for example Brassica-infecting lineages such as *A. candida*.  
Perhaps a similar NLR-based reciprocal non-host like barrier prevents *A. laibachii* from infecting  
440 *A. thaliana* relatives such as *A. lyrata*, and adapted *Albugo* species on those plants have  
expansions in another variant of the CCG effector class. This is a further reason to obtain high-  
quality genomes for additional *Albugo* species including ones closely related to *A. candida*  
(Ploch et al. 2010). Building on this work by obtaining as many diverse samples of CCG family  
proteins as possible could help unlock the structural basis for CCG recognition, which could lead  
445 to the engineering of NLR proteins that confer robust resistance through the recognition of  
pathogen effector families as opposed to single effector proteins.

## Figure Legends

450 **Figure 1. PacBio sequencing produces a more complete *Albugo candida* Ac2V genome and annotation**

1A. Plot comparing the cumulative increase of genome size by size-sorted sequence (contig or scaffold) in the Ac2VPB, Ac2VRR, Ac2VRR ‘no gaps’ and AcNc2 assemblies. The first 200 sequences only are displayed. Ac2VRR ‘no gaps’ and AcNc2 have many further smaller  
455 sequences that were thus excluded.

1B. Plot of the log number of unique kmers of length 27 bp (27mers) and their frequency of occurrence in Ac2VPB and Ac2VRR assemblies compared to Ac2V Illumina reads.

1C. Plot of counts of Illumina read depth across the Ac2VPB genome.

1D. Histogram of allele frequency at all sites showing allelic variation when Illumina reads were  
460 mapped to the Ac2VPB genome.

1E. Boxplots of the distribution of protein lengths comparing the annotation of Ac2VPB, Ac2VRR and AcNc2.

**Figure 2. The CCGs are an expanded family of secreted proteins in the *Albugo candida* Ac2V genome**  
465

2A. The CCG motifs in *A. candida* Ac2VPB and *A. laibachii* Nc14.

2B. Barchart of the predicted secretome content of Ac2VPB, Ac2VRR and AINc14.

2C. Genome density 'volcano' plot of the Ac2VPB annotation overlaid with white dots representing the CCG complement.

470 2D. Maximum-likelihood phylogeny of CCG proteins in Ac2VPB. This is based on an alignment of 60 amino-acids surrounding the conserved CCG motif. Colors and numbers indicate manually annotated phylogenetically related clusters of CCG proteins. Scale bar represents substitutions per site.

475 2E. Positioning in clusters of CCGs on four selected CCG-rich scaffolds. Colored bars and numbers indicate co-occurrence of these clusters with those defined in 2D.

**Figure 3. The CCGs in *Albugo candida* are polymorphic and have diverse transcriptional profiles**

480 3A. Distribution of nucleotide diversity (data from seven *A. candida* races) amongst three classes of genes encoding: CCGs, secreted without additional transmembrane helices and others (the remainder).

3B. Distribution of Tajima's D (data from 7 isolates) amongst three classes of genes encoding: CCGs, secreted without additional transmembrane helices and others (the remainder).

485 3C. Distribution of the uncorrected proportion of non-synonymous to synonymous mutations (data from 7 races) amongst three classes of genes: CCGs, secreted without additional transmembrane helices and others (the remainder).

490 3D. Population frequency of three classes of genes amongst 7 *A. candida* races. Most genes are present across all races (right side of graph). CCGs show an increased proportion of genes present at an intermediate frequency. The y-axis 'density' is an arbitrary scale that is necessary to compare density plots across 3 unequally sized groups.

3E. Clustering of CCG encoding genes based on their expression pattern. DPI=days post infection. z-score represents the number of standard deviations away from the normalized mean expression a given measurement is.

495 **Figure 4. Differential CCG clade expansions in *Albugo candida* and *A. laibachii***



4A. Maximum-likelihood phylogeny incorporating CCG proteins from Ac2VPB and AINc14. This is derived from an alignment of the 60 amino-acids surrounding (and including) the conserved CCG motif. Circles indicate the putative Ac2VPB orthologs of CCGs reported recognized by the *Arabidopsis thaliana* Col-0 R proteins WRR4A (red) and WRR4B (orange). Scale bar represents substitutions per site.

500

4B. Example alignment of an AINc14 expanded clade.

4C. Example alignment of an Ac2VPB expanded clade.

### Table 1. Genome statistics

505

### Table 2. Annotation statistics

Supplemental figures and data files can be downloaded separately.

510 Supplemental Figure 1: Gene read depth coverages (aligned Illumina whole genome shotgun reads): a) all genes, b) CCG-encoding genes.

Supplemental Figure 2: Trypan blue staining of Ac2V infection of *B. juncea* at 2,4,6 and 8 dpi, corresponding to RNA-extraction time points.

515

Supplemental Figure 3: a) Maximum-likelihood phylogeny of CCG proteins from Ac2VPB (orange), AINc14 (blue) and potential CCGs from *P. parasitica* (strain INRA-310) (black). This is based on an alignment of 30 amino-acids surrounding the conserved CCG motif. Scale bar represents substitutions per site.

520

Supplemental Data 1: Repeatmasker analysis

Supplemental Data 2: Metadata for all Ac2VPB predicted genes

Supplemental Data 3: Presence/absence and pseudogenization of CCGs across 7 isolates

Supplemental Data 4: CCG MAST hits in proteins with secretion signals

525

Supplemental Data 6: CCG motif file from MEME

## Author contributions

V.C. and J.D.G.J. conceived the project. V.C. collected the primary data. O.J.F., V.C., S.F., K.B.,  
530 A.R. and C.S. performed data analysis. E.B.H. provided materials. O.J.F., V.C. and J.D.G.J.  
wrote the paper. E.B.H., D.M. and J.D.G.J. provided supervision and acquired funding. All  
authors provided critical feedback during the project.

## Acknowledgements

535

We acknowledge Ram Krishna Shrestha and Agathe Jouet for technical support and assistance  
with data retrieval. This research was supported in part by the NBI Computing Infrastructure for  
Science Group, which provides technical support and maintenance to the Sainsbury  
Laboratory's high-performance computing cluster and storage systems.

540

V.C. was supported by the Biotechnology and Biological Sciences Research Council (BBSRC)  
Grant BB/L011646/1; O.J.F. was supported by BBSRC Grant BB/M003809/1; A.R. was  
supported by European Molecular Biology Organization Long-Term Fellowship ALTF-842- 2015.  
K.B. was supported by European Research Council Advanced Investigator Grant 233376  
(ALBUGON) (to J.D.G.J.). The Sainsbury Laboratory is supported by the Gatsby Charitable

545

Foundation.

## Materials and methods

*Plant and Pathogen Maintenance:* *Brassica juncea* cultivar Burgonde plants were grown on  
550 Scotts Levington F2 compost (Scotts, Ipswich, UK) in a controlled environment room (CER) at  
22 °C with a 10 h day and a 14 h night photoperiod, and was used for used as host for *A. candida*  
infections. To propagate *A. candida* race Ac2V, zoosporeangia were suspended in cold water  
and incubated on ice for 30 minutes. The spore suspension was then sprayed on four-week-old  
*B. juncea* plants. The infected plants were kept under 10 hrs light and 14 hrs dark cycles with a  
555 21°C day and 14°C night temperature.

*DNA Extraction and Genome Sequencing:* Zoosporeangia were collected from heavily infected  
*B. juncea*. The spores were then ground to fine powder in pre-chilled pestle and mortar with

liquid nitrogen. DNA extraction was then carried out using ChargeSwitch™ gDNA Plant Kit (Invitrogen, CA, USA) following manufacturer's instructions. *A. candida* Ac2V genomic DNA was sequenced by PacBio RSII platform (4 SMRTcells) (Pacific Biosciences, CA, USA) at Earlham Institute, Norwich, UK.

*RNA Extraction and Sequencing:* Four week old *B. juncea* plants were sprayed with the pathogen and between 10-15 infected leaves were collected at 2, 4, 6 and 8 days post infection (dpi) and immediately flash frozen in liquid nitrogen and stored at -80 °C. RNA extraction was carried out using Direct-zol RNA Miniprep Kit (Zymo Research, Cambridge, UK). RNA integrity was then assessed using Agilent 2100 Bioanalyzer with the RNA 6000 Nano Assay Kit (Agilent Technologies, CA, USA). Library preparation was carried out using Illumina TruSeq RNA sample preparation kit (Illumina, CA, USA). Library preparations were then sequenced on an Illumina HiSeq2000 platform and 100 bp paired-end reads were generated at Earlham Institute, Norwich, UK.

*PacBio Read Correction and Genome Assembly:* Prior to the genome assembly, Proovread (Hackl et al. 2014) error correction tool was used to correct PacBio SMRT reads (FastQ) using short Illumina reads from Ac2V (ENA: SRR1811471) (McMullan et al 2015). The genome assembly was then conducted using the error-corrected SMRT reads with Canu V1.3 (Koren et al. 2017).

*Repeat analysis:* Repeats were modeled and detected using the RepeatMasker/RepeatModeler pipeline (Smit, Hubley, and Green 2015) including RECON (version 1.08) and RepeatScout (version 1.06).

*Annotation:* The new Ac2V RNASeq reads from all time points were aligned to the Ac2VPB assembly using HISAT2 (Kim, Langmead, and Salzberg 2015). Successfully mapped reads were extracted and assembled using 3 systems: velvet/oases ((Schulz et al. 2012); versions 1.2.10 and 0.2, kmer sizes 33, 41, 49, 55), soapdenovo ((Luo et al. 2012); version 1.03, trans, kmer sizes 31, 41, 51, 61, 71) and trinity ((Grabherr et al. 2011); version 2.0.6, genome-guided with aligned reads). The resulting redundant pool of transcripts was reduced to the best isoforms using evidentialgene ((Gilbert 2013); tr2aacds v.2013.03.11). These transcripts were aligned to the genome with exonerate ((Slater and Birney 2005); v2.2.0) which provided evidence to predict genes using genemarkES suite v4.21 (Lomsadze, Burns and Borodovsky, 2014). The assembled transcripts were also used as evidence to predict genes using webaugustus v3.2.1

(Hoff and Stanke 2013). Nc2 transcripts and proteins, cloned CCG proteins and transcripts from  
590 the Ac2VRR genome were all used to separately train augustus and produce gene models.  
Independently, all mapped RNA-Seq reads were used to predict genes using braker v (Hoff et  
al. 2019). All of the resulting gene models, and the exonerate transcript mapping data were  
together fed into evidencemodeler ((Haas et al. 2008); version 1.1.1) over 3 iterations, which  
generated a maximal non-redundant genome annotation. A small number of known CCG-  
595 encoding genes were manually edited, those genes are annotated with an “m” at the end of their  
gene or transcript name.

*Gene functional annotation:* Egnog emapper (Huerta-Cepas et al. 2019); version emapper-  
1.0.3-35) with automatic taxonomic scope was used to assign functional annotations to the  
Ac2VPB predicted proteins.

600 *kmer analysis:* 27mers were counted using kat (Mapleson et al. 2017) and plotted in RStudio  
using ggplot2 v3.2.1.

*Read alignment and variant calls:* Illumina read alignment for whole genome data was performed  
using BWA v0.7.17 (Li and Durbin 2009) and Samtools v1.10 (Li et al. 2009) was used to process  
alignments and generate variant calls. VCFtools v0.1.15 (Danecek et al. 2011) was used for  
605 VCF formatting and quality filtering (variants with minimum quality of 20 were considered).

*Presence/absence variation analysis:* The BEDtools v2.29 (Quinlan 2014) command ‘bedtools  
coverage’ was used to compute both per base coverage in each alignment, and per gene  
coverage. Since any % cutoff would be arbitrary, the % coverage of each gene was used to  
contribute to an overall population frequency score scaled from 0-1 used in Fig 3D. Fig 3D was  
610 generated using the sm package in RStudio v1.2.5001 (Allaire 2012).

*Diversity and selection analysis:* Nucleotide diversity and Tajima’s D statistics were calculated  
using popgenome v2.7.1 (Pfeifer et al. 2014) with filtered combined variant call files and the  
Ac2VPB annotation as inputs.

615 *Simple pN/pS analysis:* Filtered combined variant call files were used as input for SNPEff v4.3t  
(Cingolani et al. 2012), which divided variants by their computed effect synonymous or non-  
synonymous to produce a ratio for each gene.

*ANOVA and Tukey test:* Statistical comparison of population statistics of groups of genes was  
performed by one-way ANOVA and post hoc Tukey test using the online resource [astatsa.com](http://astatsa.com).

620 *Secreted protein prediction:* Ac2VPB proteins were submitted to Signalp3 ((Bendtsen et al. 2004)) and considered secreted. TMHMM v2.0 ((Krogh and Rapacki 2016)) was used to search these proteins post their predicted signal peptide cleavage site for additional transmembrane helices.

625 *CCG searches:* CHXC/CCGs identified by previous genome projects (Links et al. 2011; McMullan et al. 2015; Jouet et al. 2019) were used as a base to generate a CCG motif with MEME ((Bailey et al. 2009); v5.1.1). This motif was used to search the Ac2VPB secreted no transmembrane domain proteins with MAST (Bailey et al. 2009). The proteins positive (E-value <0.1, correct positioning) for the CCG motif were then fed back into MEME to produce a refined CCG motif corresponding to the Ac2V CCG signature. Certain proteins outside the *Albugo* genus, with relaxed E-value threshold < 0.2 are included in the list of hits.

630 *Gene Expression Analysis:* For RNASeq data analysis, reads (2 x 100 bp) obtained from each time point were first trimmed using Trimmomatic version 0.36 (Bolger, Lohse, and Usadel 2014) and the quality of the trimmed reads was assessed with FastQC v0.11.4 (Andrews 2014). Reads were then mapped to the assembled Ac2VPB genome using HISAT2 v2.2 (Kim, Langmead, and Salzberg 2015). The counts of reads that mapped to each predicted gene were obtained using  
635 the featureCounts utility of the subread package (Liao, Smyth, and Shi 2014). Read count data were then normalized as counts per million (CPM) with EdgeR package (Robinson, McCarthy, and Smyth 2010). Cluster and heatmap were then made using z-scores obtained from normalized ( $\log_2(\text{CPM}+1)$ ) data.

640 *Genome architecture analysis:* Genome architecture analysis was performed in Rstudio following the protocol of (Saunders et al. 2014).

*CCG phylogenies:* CCG proteins were aligned using Muscle and alignments were trimmed and realigned to good quality. These alignments were used to generate maximum likelihood phylogenies using the WAG method, with freq, 3 distinct gamma categories, and 100 bootstraps. These analyses were performed in the MEGA X suite (Kumar et al. 2018). Phylogenies were  
645 edited using FigTree (Rambaut 2009).

*Karyoplot:* The Karyoplot diagram was generated using karyoplotR (Gel and Serra 2017) using the procedure described in (Van de Weyer et al. 2019).

*General tools for figure production:* Figures 1-3 and S1 were generated using the patchwork tool for Rstudio ([cran.r-project.org/web/packages/patchwork/](http://cran.r-project.org/web/packages/patchwork/)) and all figures were edited in Inkscape

650 0.92 (inkscape.org). ggplot2 v3.2.1 was used to generate scatter plots, box and whisker diagrams and bar charts.

### Data submissions and sources:

655 Data from previous studies, Illumina reads: AcBoT (ENA: SRR1811472), AcEm2 (SRR1806791), AcBoL (SRR1811474), AcNc2 (SRR1811450), Ac2V (SRR1811471). ESTs from Ac2vRR (downloaded from NCBI genbank: HO914811-HO965058, HO965059-HO999999, and HS000001-HS003763), assemblies and annotations of AcNc2, AINc14, and Ac2vRR. Data submitted: Ac2vPB PacBio reads (PRJEB39673), Ac2v RNASeq reads, Ac2VPB assembly  
660 (GCA\_905220665.1), AcEx1 Illumina reads (ERR4395362) Ac7V Illumina reads (ERR5168241), Ac2VPB annotation. The Ac2VPB annotation can be downloaded as GFF or FASTA files at [https://github.com/oliverjf/ac2v\\_genomics](https://github.com/oliverjf/ac2v_genomics).

### Works cited

665 Adhikari, T. B., Liu, J. Q., Mathur, S., Wu, C. X., and Rimmer, S. R. 2003. Genetic and molecular analyses in crosses of race 2 and race 7 of *Albugo candida*. *Phytopathology*. 93:959–965.

Allaire, J. 2012. RStudio: integrated development environment for R. Boston, MA. 770:394.

670 Andrews, S. 2014. FastQC a quality-control tool for high-throughput sequence data <http://www.Bioinformaticsbabraham.ac.uk/projects/fastqc>.

Bailey, T. L., Boden, M., Buske, F. A., Frith, M., Grant, C. E., Clementi, L., et al. 2009. MEME SUITE: tools for motif discovery and searching. *Nucleic Acids Res.* 37:W202–8.

Baxter, L., Tripathy, S., Ishaque, N., Boot, N., Cabral, A., Kemen, E., et al. 2010. Signatures of  
675 adaptation to obligate biotrophy in the *Hyaloperonospora arabidopsidis* genome. *Science*. 330:1549–1551.

Bendtsen, J. D., Nielsen, H., von Heijne, G., and Brunak, S. 2004. Improved prediction of signal peptides: SignalP 3.0. *J. Mol. Biol.* 340:783–795.

Bolger, A. M., Lohse, M., and Usadel, B. 2014. Trimmomatic: a flexible trimmer for Illumina  
680 sequence data. *Bioinformatics*. 30:2114–2120.

- Borhan, M. H., Gunn, N., Cooper, A., Gulden, S., Tör, M., Rimmer, S. R., et al. 2008. WRR4 encodes a TIR-NB-LRR protein that confers broad-spectrum white rust resistance in *Arabidopsis thaliana* to four physiological races of *Albugo candida*. *Mol. Plant. Microbe. Interact.* 21:757–768.
- 685 Borhan, M. H., Holub, E. B., Beynon, J. L., Rozwadowski, K., and Rimmer, S. R. 2004. The arabidopsis TIR-NB-LRR gene RAC1 confers resistance to *Albugo candida* (white rust) and is dependent on EDS1 but not PAD4. *Mol. Plant. Microbe. Interact.* 17:711–719.
- Brefort, T., Tanaka, S., Neidig, N., Doehlemann, G., Vincon, V., and Kahmann, R. 2014. Characterization of the largest effector gene cluster of *Ustilago maydis*. *PLoS Pathog.* 10:e1003866.
- 690 Castel, B., Fairhead, S., Furzer, O.J., Redkar, A., Wang, S., Cevik, V., Holub, E.B., and Jones, J.D.G. 2021. Evolutionary trade-offs at the Arabidopsis *WRR4A* resistance locus underpin alternate *Albugo candida* recognition specificities. *BioRxiv* (simultaneous submission)
- Cevik, V., Boutrot, F., Apel, W., Robert-Seilaniantz, A., Furzer, O. J., Redkar, A., et al. 2019. Transgressive segregation reveals mechanisms of Arabidopsis immunity to Brassica-infecting races of white rust (*Albugo candida*). *Proc. Natl. Acad. Sci. U. S. A.* Available at: <http://dx.doi.org/10.1073/pnas.1812911116>.
- Cingolani, P., Platts, A., Wang, L. L., Coon, M., Nguyen, T., Wang, L., et al. 2012. A program for annotating and predicting the effects of single nucleotide polymorphisms, SnpEff: SNPs in the genome of *Drosophila melanogaster* strain w1118; iso-2; iso-3. *Fly* . 6:80–92.
- 700 Cuomo, C. A., Güldener, U., Xu, J.-R., Trail, F., Turgeon, B. G., Di Pietro, A., et al. 2007. The *Fusarium graminearum* genome reveals a link between localized polymorphism and pathogen specialization. *Science.* 317:1400–1402.
- Danecek, P., Auton, A., Abecasis, G., Albers, C. A., Banks, E., DePristo, M. A., et al. 2011. The variant call format and VCFtools. *Bioinformatics.* 27:2156–2158.
- 705 Fairhead, S. 2016. Translating genetics of oomycete resistance from *Arabidopsis thaliana* into Brassica production. Available at: [http://wrap.warwick.ac.uk/90258/1/WRAP\\_Theses\\_Fairhead\\_2016.pdf](http://wrap.warwick.ac.uk/90258/1/WRAP_Theses_Fairhead_2016.pdf).
- Gel, B., and Serra, E. 2017. karyoploteR: an R/Bioconductor package to plot customizable genomes displaying arbitrary data. *Bioinformatics.* 33:3088–3090.
- 710 Gilbert, D. 2013. EvidentialGene: tr2aacds, mRNA transcript assembly software. URL

<http://arthropods.eugenes.org/EvidentialGene>.

- 715 Grabherr, M. G., Haas, B. J., Yassour, M., Levin, J. Z., Thompson, D. A., Amit, I., et al. 2011. Full-length transcriptome assembly from RNA-Seq data without a reference genome. *Nat. Biotechnol.* 29:644–652.
- Haas, B. J., Kamoun, S., Zody, M. C., Jiang, R. H. Y., Handsaker, R. E., Cano, L. M., et al. 2009. Genome sequence and analysis of the Irish potato famine pathogen *Phytophthora infestans*. *Nature*. 461:393–398.
- 720 Haas, B. J., Salzberg, S. L., Zhu, W., Pertea, M., Allen, J. E., Orvis, J., et al. 2008. Automated eukaryotic gene structure annotation using EVIDENCEModeler and the Program to Assemble Spliced Alignments. *Genome Biol.* 9:R7.
- Hackl, T., Hedrich, R., Schultz, J., and Förster, F. 2014. proovread: large-scale high-accuracy PacBio correction through iterative short read consensus. *Bioinformatics*. 30:3004–3011.
- Hoff, K. J., and Stanke, M. 2013. WebAUGUSTUS—a web service for training AUGUSTUS and predicting genes in eukaryotes. *Nucleic Acids Res.* 41:W123–W128.
- 725 Hoff, K. J., Lomsadze, A., Borodovsky, M., and Stanke, M. 2019. Whole-Genome Annotation with BRAKER. In *Gene Prediction: Methods and Protocols*, ed. Martin Kollmar. New York, NY: Springer New York, p. 65–95.
- Holub, E. B., Brose, E., Tör, M., Clay, C., Crute, I. R., and Beynon, J. L. 1995. Phenotypic and genotypic variation in the interaction between *Arabidopsis thaliana* and *Albugo candida*. *Mol. Plant. Microbe. Interact.* 8:916–928.
- 730 Huerta-Cepas, J., Szklarczyk, D., Heller, D., Hernández-Plaza, A., Forslund, S. K., Cook, H., et al. 2019. eggNOG 5.0: a hierarchical, functionally and phylogenetically annotated orthology resource based on 5090 organisms and 2502 viruses. *Nucleic Acids Res.* 47:D309–D314.
- 735 Jouet, A., Saunders, D. G. O., McMullan, M., Ward, B., Furzer, O., Jupe, F., et al. 2019. *Albugo candida* race diversity, ploidy and host-associated microbes revealed using DNA sequence capture on diseased plants in the field. *New Phytologist*. 221:1529–1543 Available at: <http://dx.doi.org/10.1111/nph.15417>.
- 740 Kamoun, S., Furzer, O., Jones, J. D. G., Judelson, H. S., Ali, G. S., Dalio, R. J. D., et al. 2015. The Top 10 oomycete pathogens in molecular plant pathology. *Mol. Plant Pathol.* 16:413–434.



- Kämper, J., Kahmann, R., Bölker, M., Ma, L.-J., Brefort, T., Saville, B. J., et al. 2006. Insights from the genome of the biotrophic fungal plant pathogen *Ustilago maydis*. *Nature*. 444:97–101.
- 745
- Kemen, E., Gardiner, A., Schultz-Larsen, T., Kemen, A. C., Balmuth, A. L., Robert-Seilaniantz, A., et al. 2011. Gene gain and loss during evolution of obligate parasitism in the white rust pathogen of *Arabidopsis thaliana*. *PLoS Biol.* 9:e1001094.
- Kim, D., Langmead, B., and Salzberg, S. L. 2015. HISAT: a fast spliced aligner with low
- 750 memory requirements. *Nat. Methods.* 12:357–360.
- Koren, S., Walenz, B. P., Berlin, K., Miller, J. R., Bergman, N. H., and Phillippy, A. M. 2017. Canu: scalable and accurate long-read assembly via adaptive k-mer weighting and repeat separation. *Genome Res.* 27:722–736.
- Krogh, A., and Rapacki, K. 2016. TMHMM Server, v. 2.0. [cbs.dtu.dk](http://cbs.dtu.dk).
- 755 Kumar, S., Stecher, G., Li, M., Knyaz, C., and Tamura, K. 2018. MEGA X: Molecular Evolutionary Genetics Analysis across Computing Platforms. *Mol. Biol. Evol.* 35:1547–1549.
- Li, H., and Durbin, R. 2009. Fast and accurate short read alignment with Burrows–Wheeler transform. *Bioinformatics.* 25:1754–1760.
- 760 Li, H., Handsaker, B., Wysoker, A., Fennell, T., Ruan, J., Homer, N., et al. 2009. The Sequence Alignment/Map format and SAMtools. *Bioinformatics.* 25:2078–2079.
- Liao, Y., Smyth, G. K., and Shi, W. 2014. featureCounts: an efficient general purpose program for assigning sequence reads to genomic features. *Bioinformatics.* 30:923–930.
- Links, M. G., Holub, E., Jiang, R. H. Y., Sharpe, A. G., Hegedus, D., Beynon, E., et al. 2011.
- 765 De novo sequence assembly of *Albugo candida* reveals a small genome relative to other biotrophic oomycetes. *BMC Genomics.* 12:503.
- Lomsadze, A., Burns, P. D., and Borodovsky, M. 2014. Integration of mapped RNA-Seq reads into automatic training of eukaryotic gene finding algorithm. *Nucleic Acids Res.* 42:e119.
- Luo, R., Liu, B., Xie, Y., Li, Z., Huang, W., Yuan, J., et al. 2012. SOAPdenovo2: an empirically
- 770 improved memory-efficient short-read de novo assembler. *Gigascience.* 1:18.
- Mapleson, D., Garcia Accinelli, G., Kettleborough, G., Wright, J., and Clavijo, B. J. 2017. KAT: a K-mer analysis toolkit to quality control NGS datasets and genome assemblies. *Bioinformatics.* 33:574–576.

- 775 McMullan, M., Gardiner, A., Bailey, K., Kemen, E., Ward, B. J., Cevik, V., et al. 2015. Evidence for suppression of immunity as a driver for genomic introgressions and host range expansion in races of *Albugo candida*, a generalist parasite. *Elife*. 4 Available at: <http://dx.doi.org/10.7554/eLife.04550>.
- Ohno, S. 1970. Evolution by Gene Duplication.
- 780 Pfeifer, B., Wittelsbürger, U., Ramos-Onsins, S. E., and Lercher, M. J. 2014. PopGenome: an efficient Swiss army knife for population genomic analyses in R. *Mol. Biol. Evol.* 31:1929–1936.
- Prince, D. C., Rallapalli, G., Xu, D., Schoonbeek, H.-J., Çevik, V., Asai, S., et al. 2017. *Albugo*-imposed changes to tryptophan-derived antimicrobial metabolite biosynthesis may contribute to suppression of non-host resistance to *Phytophthora infestans* in *Arabidopsis thaliana*. *BMC Biology*. 15 Available at: <http://dx.doi.org/10.1186/s12915-017-0360-z>.
- 785 Quinlan, A. R. 2014. BEDTools: The Swiss-army tool for genome feature analysis: BEDTools: The Swiss-army tool for genome feature analysis. *Curr. Protoc. Bioinformatics*. 47:11.12.1–34.
- Raffaele, S., and Kamoun, S. 2012. Genome evolution in filamentous plant pathogens: why 790 bigger can be better. *Nat. Rev. Microbiol.* 10:417–430.
- Raffaele, S., Farrer, R. A., Cano, L. M., Studholme, D. J., MacLean, D., Thines, M., et al. 2010. Genome evolution following host jumps in the Irish potato famine pathogen lineage. *Science*. 330:1540–1543.
- Rambaut, A. 2009. FigTree v1. 3.1. <http://tree.bio.ed.ac.uk/software/figtree/>. Available at: 795 <https://ci.nii.ac.jp/naid/10030433668/>.
- Redkar, A., Cevik, V., Bailey, K., Furzer, O.J., Fairhead, S., Borhan, M.H., Holub, E.B. and Jones, J.D.G. 2021. The *Arabidopsis* WRR4A and WRR4B paralogous NLR proteins both confer recognition of multiple *Albugo candida* effectors. *BioRxiv* (simultaneous submission).
- 800 Robinson, M. D., McCarthy, D. J., and Smyth, G. K. 2010. edgeR: a Bioconductor package for differential expression analysis of digital gene expression data. *Bioinformatics*. 26:139–140.
- Saunders, D. G. O., Win, J., Kamoun, S., and Raffaele, S. 2014. Two-dimensional data binning for the analysis of genome architecture in filamentous plant pathogens and other

- 805 eukaryotes. *Methods Mol. Biol.* 1127:29–51.
- Schulz, M. H., Zerbino, D. R., Vingron, M., and Birney, E. 2012. Oases: robust de novo RNA-seq assembly across the dynamic range of expression levels. *Bioinformatics.* 28:1086–1092.
- Simão, F. A., Waterhouse, R. M., Ioannidis, P., Kriventseva, E. V., and Zdobnov, E. M. 2015. BUSCO: assessing genome assembly and annotation completeness with single-copy orthologs. *Bioinformatics.* 31:3210–3212.
- 810 Slater, G. S. C., and Birney, E. 2005. Automated generation of heuristics for biological sequence comparison. *BMC Bioinformatics.* 6:31.
- Smit, A. F. A., Hubley, R., and Green, P. 2015. RepeatMasker Open-4.0. 2013--2015.
- 815 Soskine, M., and Tawfik, D. S. 2010. Mutational effects and the evolution of new protein functions. *Nat. Rev. Genet.* 11:572–582.
- Stam, R., Jupe, J., Howden, A. J. M., Morris, J. A., Boevink, P. C., Hedley, P. E., et al. 2013. Identification and Characterisation CRN Effectors in *Phytophthora capsici* Shows Modularity and Functional Diversity. *PLoS One.* 8:e59517.
- 820 Tajima, F. 1989. Statistical method for testing the neutral mutation hypothesis by DNA polymorphism. *Genetics.* 123:585–595.
- Thines, M., Choi, Y.-J., Kemen, E., Ploch, S., Holub, E. B., Shin, H.-D., et al. 2009. A new species of *Albugo* parasitic to *Arabidopsis thaliana* reveals new evolutionary patterns in white blister rusts (*Albuginaceae*). *Persoonia.* 22:123–128.
- 825 Torto, T. A., Li, S., Styer, A., Huitema, E., Testa, A., Gow, N. A. R., et al. 2003. EST mining and functional expression assays identify extracellular effector proteins from the plant pathogen *Phytophthora*. *Genome Res.* 13:1675–1685.
- Van de Weyer, A.-L., Monteiro, F., Furzer, O. J., Nishimura, M. T., Cevik, V., Witek, K., et al. 2019. A Species-Wide Inventory of NLR Genes and Alleles in *Arabidopsis thaliana*. *Cell.* 178:1260–1272.e14.
- 830 Win, J., Morgan, W., Bos, J., Krasileva, K. V., Cano, L. M., Chaparro-Garcia, A., et al. 2007. Adaptive evolution has targeted the C-terminal domain of the RXLR effectors of plant pathogenic oomycetes. *Plant Cell.* 19:2349–2369.
